# Supplementary material
Source: Royal Society of Chemistry journal article supplement (doi:10.1039/d6cc00291a)
Supplement: d6cc00291a1.pdf [file d6cc00291a1.pdf]

## ***Supporting Information***

### **Interfacial electron modulation of RuO<sub>2</sub>@NiO enables efficient hydrazine-assisted hydrogen production in alkaline seawater**

Boxue Wang,<sup>a</sup> Huachuan Sun,<sup>\*a</sup> Mingpeng Chen,<sup>a</sup> Tong Zhou,<sup>a</sup> Hongshun Zheng,<sup>a</sup> Minghui Shi,<sup>a</sup> Dequan Li,<sup>a</sup> Yewen Wu,<sup>a</sup> Yumin Zhang,<sup>a</sup> Jin Zhang,<sup>a</sup> Hao Cui,<sup>b</sup> Qingju Liu<sup>\*a</sup>

<sup>a</sup>National Center for International Joint Research of Photoelectric Energy Materials and Application, Yunnan Key Laboratory for Micro/Nano Materials & Technology, School of Materials and Energy, Yunnan University, Kunming 650091, China.

<sup>b</sup>Yunnan Precious Metals Laboratory Co., Ltd., Kunming, 650106, P. R. China.

† Footnotes relating to the title and/or authors should appear here.

\* Corresponding author.

## **1. Experimental section**

### **1.1. Chemicals**

The nickel(II) nitrate hexahydrate ( $\text{Ni}(\text{NO}_3)_2 \cdot 6\text{H}_2\text{O}$ , analytical reagent (AR),  $\geq 98\%$ ), hexamethylenetetramine ( $\text{C}_6\text{H}_{12}\text{N}_4$ , HMT), ruthenium(III) chloride hydrate ( $\text{RuCl}_3 \cdot x\text{H}_2\text{O}$ , 35.0–42.0% Ru basis), and potassium hydroxide (KOH, AR,  $\geq 85\%$ ) were purchased from Aladdin (Shanghai, China). The commercial Pt/C (20 wt%) and nickel foam (NF) were purchased from Suzhou Sinero Technology Co., Ltd. The absolute ethanol and hydrochloric acid (HCl, 36%–38%) were purchased from Chengdu Kelong Chemical Co. Ltd. Nafion solution (5 wt%) was obtained from Sigma-Aldrich. Hydrazine hydrate ( $\text{N}_2\text{H}_4 \cdot \text{H}_2\text{O}$ , 80%) was purchased from Chongqing Chuandong Chemical (Group) Co., Ltd. In addition, the natural seawater was collected from the Bohai Sea (latitude  $40.6179^\circ$  N, longitude  $120.8107^\circ$  E) and subjected only to a simple filtration before use. All the chemicals were used directly without any purification. Deionized (DI) water with a resistivity of  $18.2 \text{ M}\Omega \text{ cm}$  was used during the experiments.

### **1.2. Pretreatment of NF**

Several pieces of NF with a size of  $2 \times 4 \text{ cm}^2$  were sequentially ultrasonically cleaned in 3 M HCl, deionized (DI) water, and ethanol for 8, 5, and 5 min, respectively, and then naturally dried at room temperature to obtain clean NF.

### **1.3. Preparation of $\text{Ni}(\text{OH})_2/\text{NF}$**

Self-supported  $\text{Ni}(\text{OH})_2/\text{NF}$  precursors were synthesized via a one-step hydrothermal method. Typically,  $\text{Ni}(\text{NO}_3)_2 \cdot 6\text{H}_2\text{O}$  (1.6 g) and HMT (1.6 g) were dissolved in DI water (40 mL) and ultrasonicated for 20 min to form a homogeneous solution. The solution was then transferred to a Teflon-lined stainless-steel autoclave, and the pretreated NF was immersed in the solution. The hydrothermal reaction was carried out at  $110^\circ \text{C}$  for 12 h. After naturally cooling to room temperature, the obtained sample was taken out, thoroughly rinsed with DI water and ethanol, and dried to yield  $\text{Ni}(\text{OH})_2/\text{NF}$ .

### **1.4. Preparation of $\text{NiO}/\text{NF}$**

NiO/NF was obtained by annealing the as-prepared Ni(OH)<sub>2</sub>/NF precursor in air at 300 °C for 3 h.

### 1.5. Preparation of RuO<sub>2</sub>@NiO/NF and RuO<sub>2</sub>/NF

RuO<sub>2</sub>@NiO/NF was prepared via an impregnation-annealing process. Specifically, the Ni(OH)<sub>2</sub>/NF precursor was immersed in an aqueous RuCl<sub>3</sub>·xH<sub>2</sub>O solution (4 mg mL<sup>-1</sup>) at room temperature for 24 h. After impregnation, the sample was rinsed with DI water and ethanol, dried, and then annealed in air at 300 °C for 3 h to obtain RuO<sub>2</sub>@NiO/NF-4 (denoted as RuO<sub>2</sub>@NiO/NF). The mass loading on the NF was determined to be 1.57 mg cm<sup>-2</sup> by measuring the weight of the sample before and after preparation. For comparison, the RuCl<sub>3</sub>·xH<sub>2</sub>O concentration was adjusted to 2 and 6 mg mL<sup>-1</sup> under identical conditions, and the resulting samples were denoted as RuO<sub>2</sub>@NiO/NF-2 and RuO<sub>2</sub>@NiO/NF-6, respectively. To investigate the effect of annealing temperature, the annealing temperature was varied to 200 °C and 400 °C while keeping other conditions unchanged, and the resulting samples were denoted as RuO<sub>2</sub>@NiO/NF-T200 and RuO<sub>2</sub>@NiO/NF-T400, respectively. For reference, RuO<sub>2</sub>/NF was fabricated following the same impregnation-annealing procedure as RuO<sub>2</sub>@NiO/NF, except that the Ni(OH)<sub>2</sub>/NF precursor was directly replaced with pristine NF.

### 1.6. Preparation of Pt/C

Typically, 5 mg commercial Pt/C (20 wt%) was dispersed in a mixture solution of 400 μL DI water, 560 μL absolute ethanol, and 40 μL Nafion solution, and then ultrasonicated to form a homogeneous ink. Pt/C electrodes were obtained by uniformly dropping 200 μL of ink onto the treated NF (1 × 1 cm<sup>2</sup>) and then drying overnight at room temperature.

## 2. Material characterizations

X-ray diffraction (XRD) patterns were collected on a Rigaku TTRIII-18 kW diffractometer using Cu Kα radiation ( $\lambda = 1.5406 \text{ \AA}$ ) with a scan rate of 5° min<sup>-1</sup> over 20–80°. Raman spectra were recorded on a confocal Raman spectrometer (HORIBA XploRA PLUS) with a laser excitation at  $\lambda = 532 \text{ nm}$  over the range of 200–1400 cm<sup>-1</sup>.

X-ray photoelectron spectroscopy (XPS) was performed on a Thermo Scientific K-Alpha+ spectrometer equipped with a monochromatic Al K $\alpha$  source ( $h\nu = 1486.6$  eV). All spectra were acquired under identical conditions and calibrated to the C 1s peak at 284.8 eV. The morphology and microstructure were characterized by field-emission scanning electron microscopy (FEI Nova NanoSEM 450) and transmission electron microscopy (TEM/HRTEM, JEOL JEM-F200); elemental mappings were obtained by STEM-EDS. Inductively coupled plasma optical emission spectrometry (ICP-OES, Agilent 5110) and ion chromatography (IC, Thermo Scientific ICS-1100) were employed for elemental and chloride quantification, respectively.

### 3. Electrochemical measurements

The electrochemical performance of the prepared samples was measured in a typical three-electrode system using CHI 1140C and CHI 760E electrochemical workstations. Specifically, the reference electrode, counter electrode, and working electrode were Hg/HgO, carbon rod, and the synthesized samples ( $1 \times 1$  cm<sup>2</sup>), respectively. All electrochemical tests were conducted in an alkaline seawater (1M KOH +seawater) or alkaline seawater containing hydrazine (1.0 M KOH + 0.5 M N<sub>2</sub>H<sub>4</sub>) at a sweep rate of 5 mV s<sup>-1</sup>. After KOH addition, the Cl<sup>-</sup> concentrations in the alkaline seawater electrolytes (with/without 0.5 M N<sub>2</sub>H<sub>4</sub>) were determined by IC to be 0.486 and 0.494 mol L<sup>-1</sup>, respectively. All potentials were normalized to the reversible hydrogen electrode (RHE). All potentials were converted to the RHE scale at 25 °C using a Hg/HgO (1.0 M KOH) reference electrode according to  $E_{\text{RHE}} = E_{\text{Hg/HgO}}^0 + 0.0591 \times \text{pH}$  (0.098 V vs SHE at 25 °C). Unless otherwise stated, all potentials in this work are reported vs RHE. The ohmic drop was compensated using the built-in *iR* compensation function of the CHI electrochemical workstation (positive feedback mode). The solution resistance *R* was automatically determined by the instrument (via a small-amplitude perturbation) prior to polarization measurements, and 95% *iR* compensation was applied to avoid potential overcompensation/instability at high current densities. The corrected potential was calculated as  $E_{\text{corrected}} = E_{\text{measured}} - 0.95iR$ . The double-layer

capacitance ( $C_{dl}$ ) was calculated by measuring cyclic voltammetry (CV) at different sweep rates (100, 120, 140, 160, and 180  $\text{mV s}^{-1}$ ) during the non-Faradaic region. The charge transfer resistance ( $R_{ct}$ ) was obtained by measuring electrochemical impedance spectroscopy (EIS) in the frequency range from 10000 to 0.01 Hz.

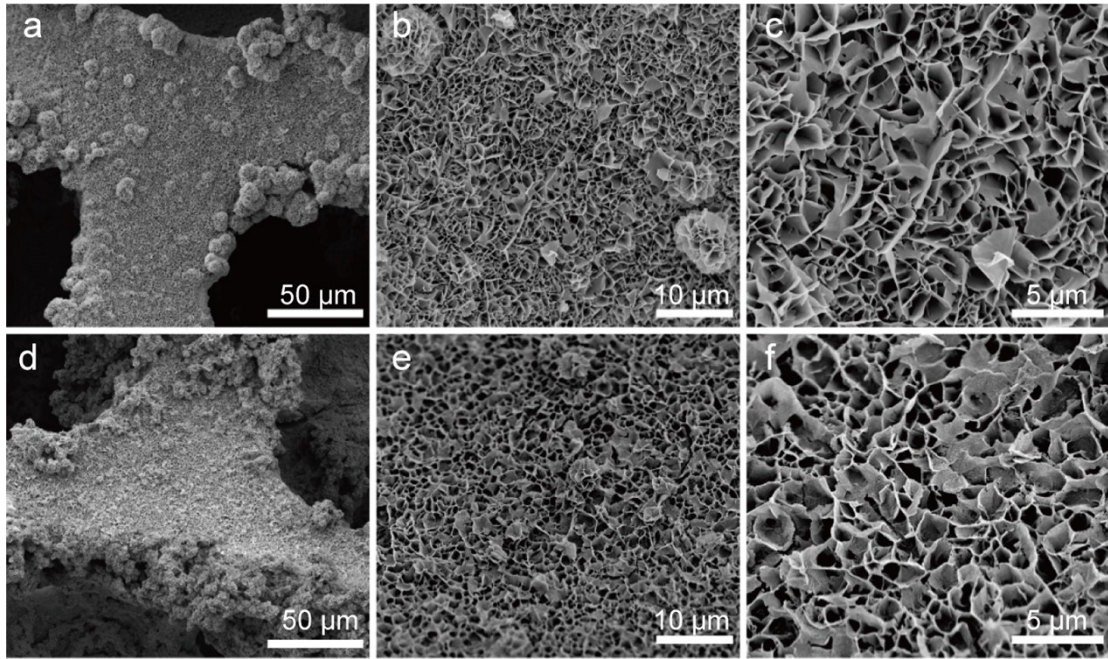

**Fig. S1** SEM images of (a–c) NiO/NF and (d–f) RuO<sub>2</sub>@NiO/NF at different magnifications.

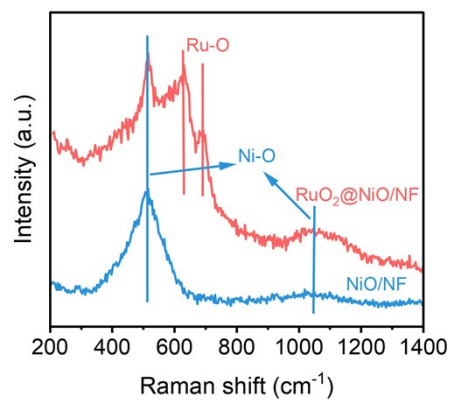

**Fig. S2** Raman spectra of  $\text{NiO}/\text{NF}$  and  $\text{RuO}_2@/\text{NiO}/\text{NF}$ .

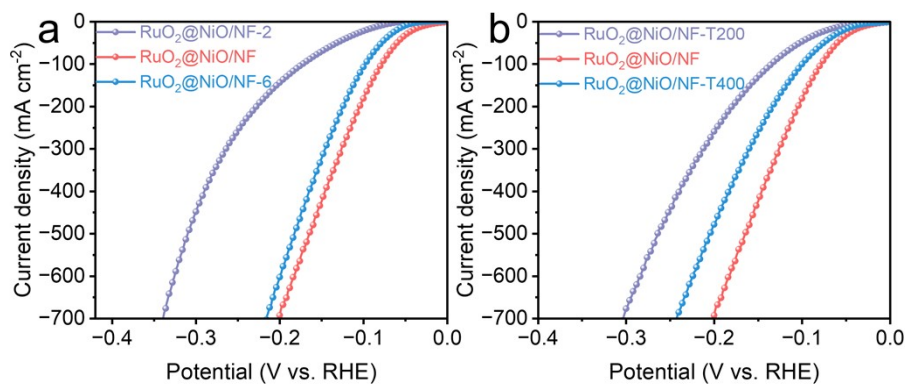

**Fig. S3** LSV curves of (a) RuO<sub>2</sub>@NiO/NF-2, RuO<sub>2</sub>@NiO/NF, and RuO<sub>2</sub>@NiO/NF-6 and (b) RuO<sub>2</sub>@NiO/NF-T200, RuO<sub>2</sub>@NiO/NF, and RuO<sub>2</sub>@NiO/NF-T400.

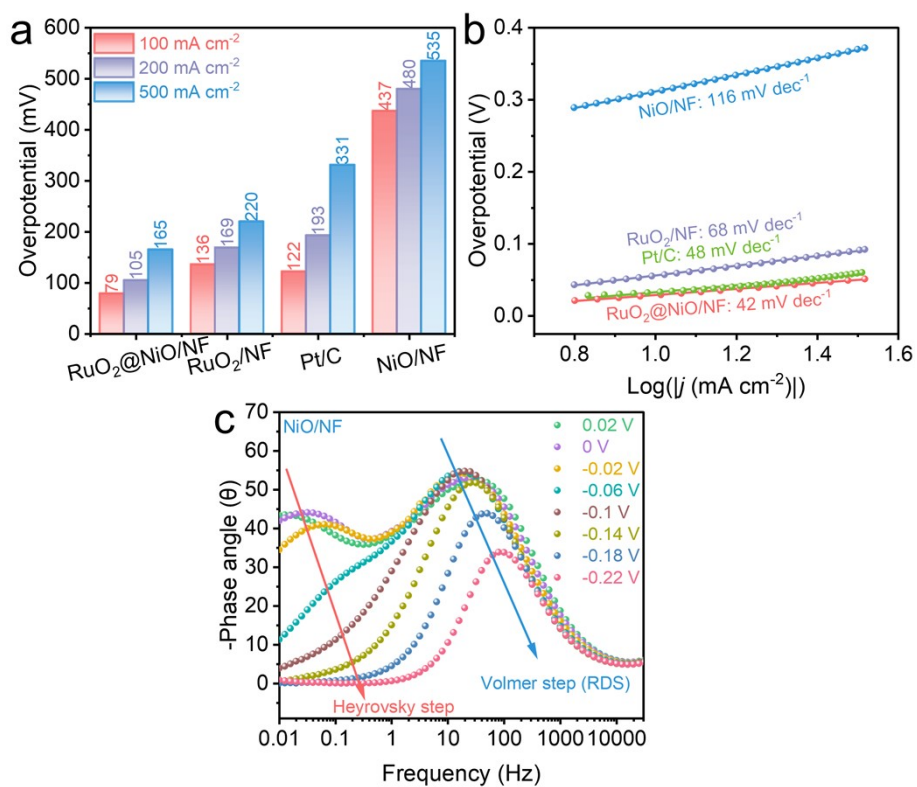

**Fig. S4** (a) The overpotentials of RuO<sub>2</sub>@NiO/NF, RuO<sub>2</sub>/NF, NiO/NF, and Pt/C at different current densities. (b) Tafel slopes of RuO<sub>2</sub>@NiO/NF, RuO<sub>2</sub>/NF, NiO/NF, and Pt/C. (c) In situ Bode phase plots of NiO/NF.

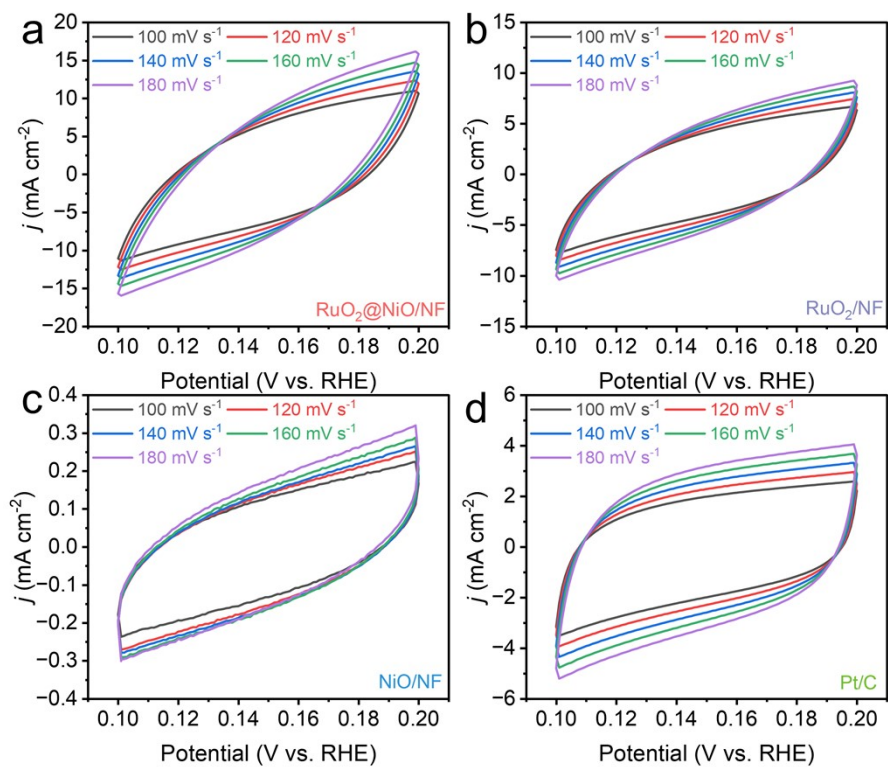

**Fig. S5** CV curves of (a) RuO<sub>2</sub>@NiO/NF, (b) RuO<sub>2</sub>/NF, (c) NiO/NF, and (d) Pt/C.

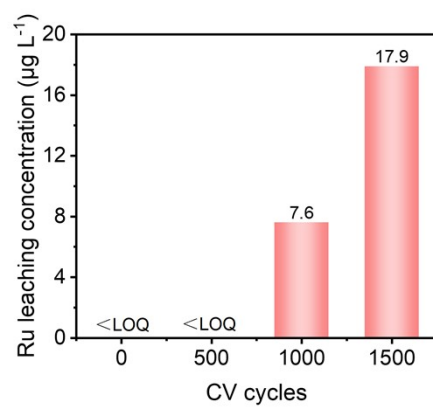

**Fig. S6** Ru ion concentration in the electrolyte after different CV cycles during the HER process.

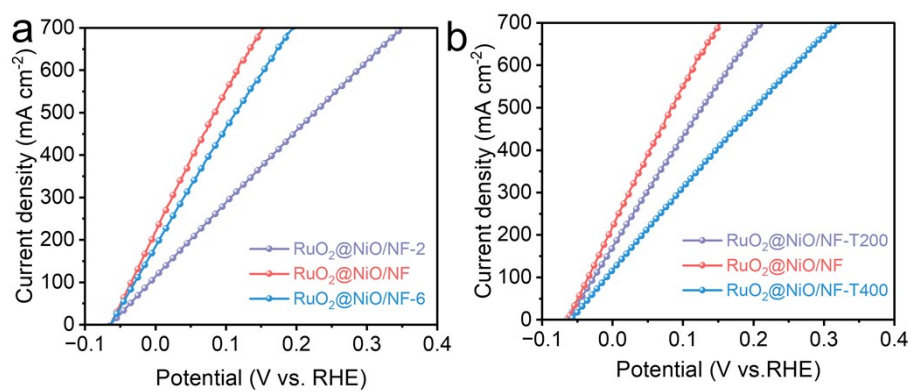

**Fig. S7** LSV curves of (a)  $\text{RuO}_2@\text{NiO}/\text{NF}-2$ ,  $\text{RuO}_2@\text{NiO}/\text{NF}$ , and  $\text{RuO}_2@\text{NiO}/\text{NF}-6$  and (b)  $\text{RuO}_2@\text{NiO}/\text{NF}-\text{T}200$ ,  $\text{RuO}_2@\text{NiO}/\text{NF}$ , and  $\text{RuO}_2@\text{NiO}/\text{NF}-\text{T}400$ .

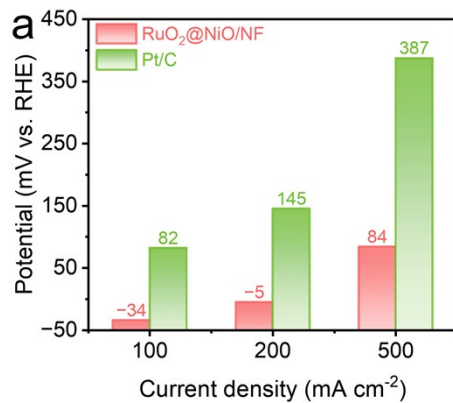

**Fig. S8** The potentials of RuO<sub>2</sub>@NiO/NF, RuO<sub>2</sub>/NF, NiO/NF, and Pt/C at different current densities.

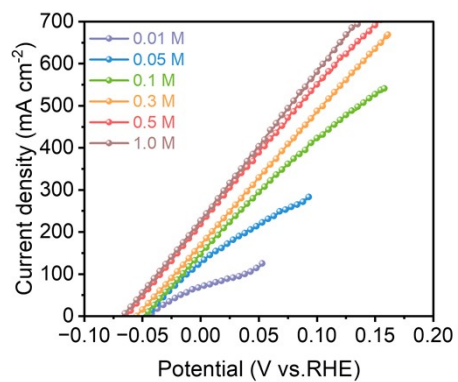

**Fig. S9** LSV curves of RuO<sub>2</sub>@NiO/NF at different hydrazine concentrations.

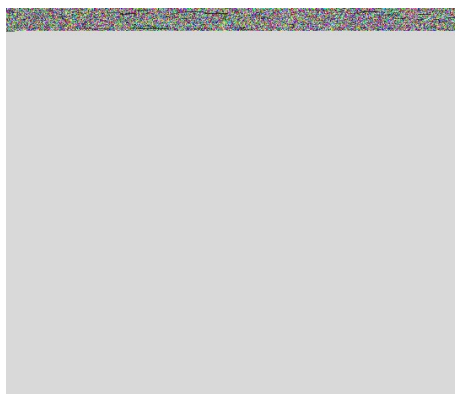

**Fig. S10** Tafel slopes of RuO<sub>2</sub>@NiO/NF, RuO<sub>2</sub>/NF, NiO/NF, and Pt/C.

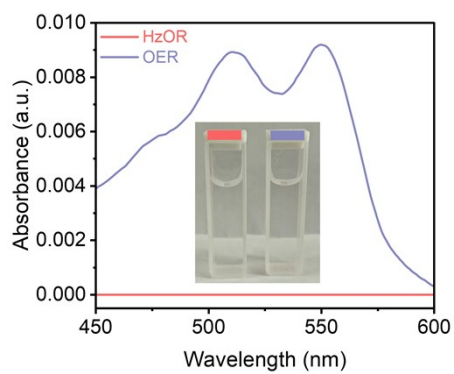

**Fig. S11** UV-vis spectra of the electrolyte after 1500 CV cycles under HzOR and OER conditions (DPD method), showing a negligible hypochlorite/free-chlorine signal for HzOR compared with the OER control. Inset: photographs of the corresponding electrolyte solutions.

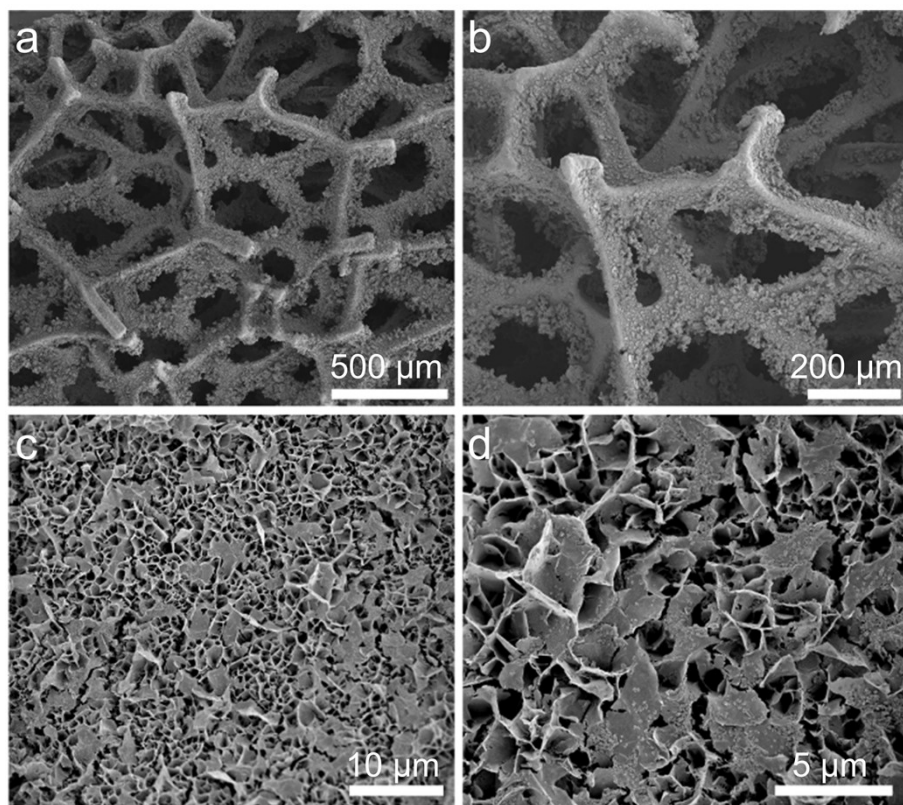

**Fig. S12** SEM images of RuO<sub>2</sub>@NiO/NF after the stability test.

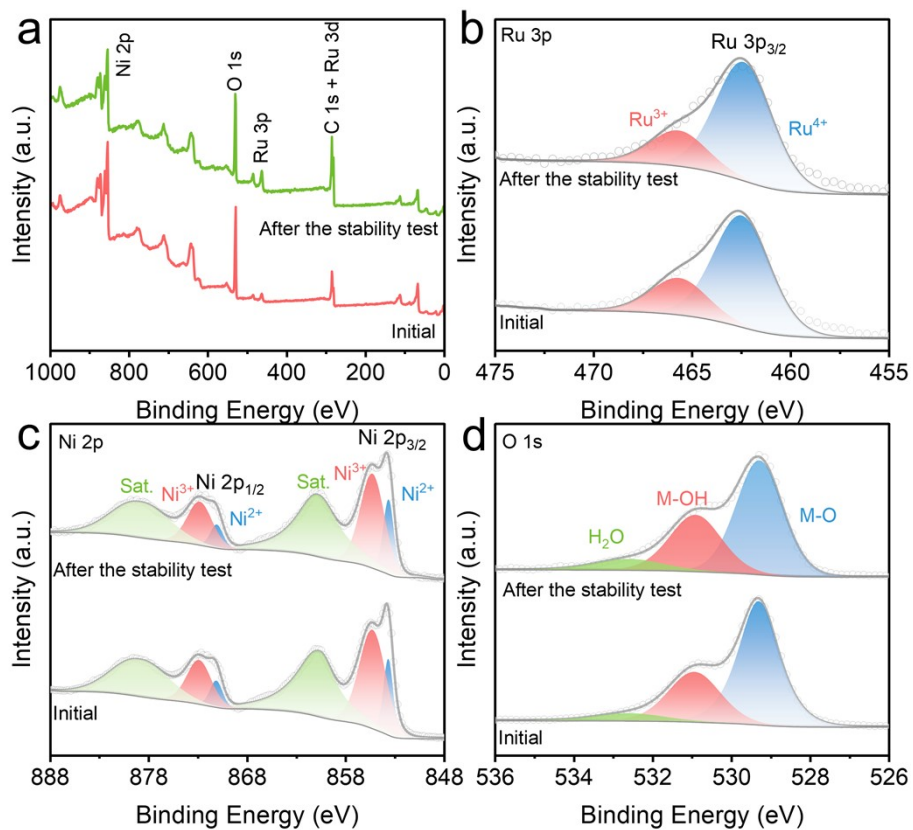

**Fig. S13** XPS spectra of RuO<sub>2</sub>@NiO/NF before and after the stability test.

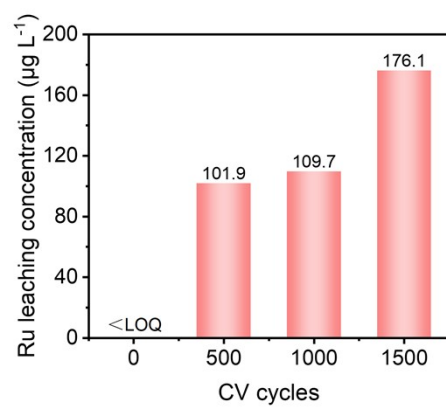

**Fig. S14** Ru ion concentration in the electrolyte after different CV cycles during the HzOR process.

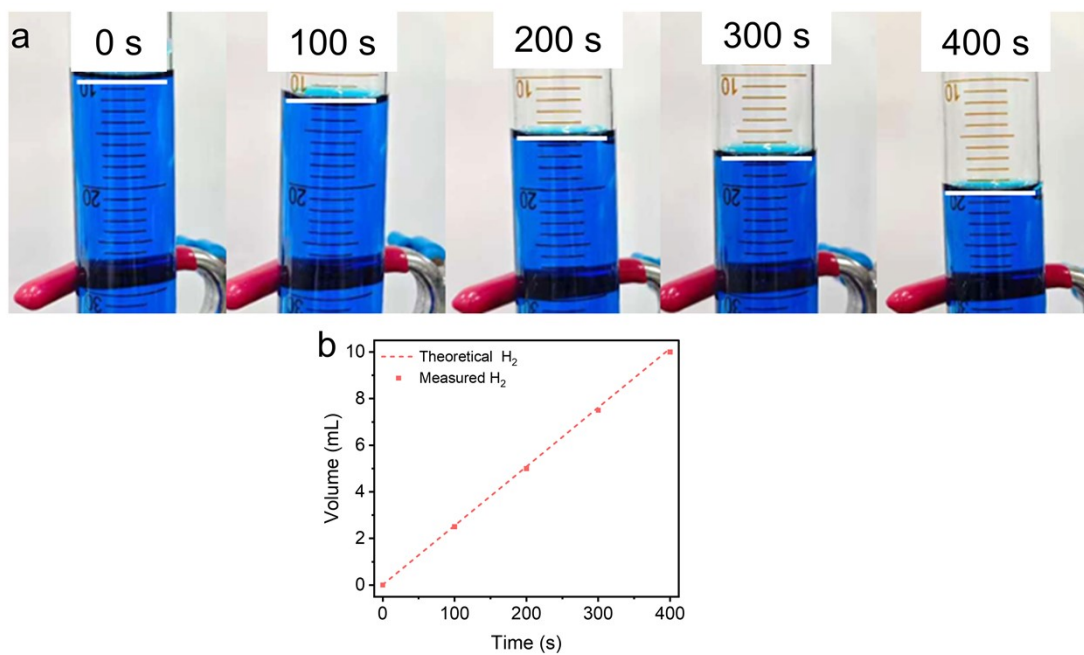

**Fig. S15** (a) Experimental device for measuring Faraday efficiency by drainage method. (b) Photographs of gas collection at different times. (c) Theoretical and measured gas production at different times.

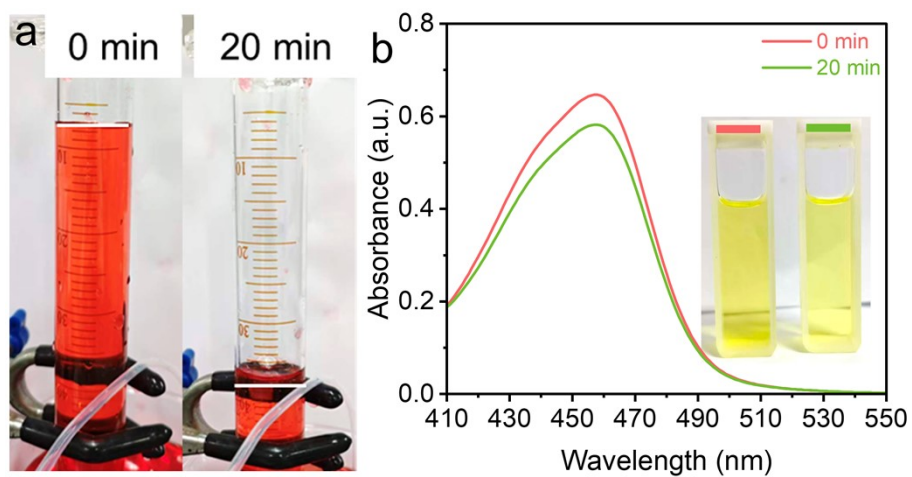

**Fig. S16** (a) Photographs of anodic gas collection at 0 and 20 min during HzOR electrolysis. (b) UV-vis spectra (p-DMAB method) of the electrolyte at 0 and 20 min, indicating the decrease in  $\text{N}_2\text{H}_4$  concentration during operation (inset: photographs of the corresponding solutions).

**Table S1.** ICP results.

| Materials                  | Ni (wt%) | Ru (wt%) |
|----------------------------|----------|----------|
| RuO <sub>2</sub> @NiO/NF-2 | 55.44    | 9.85     |
| RuO <sub>2</sub> @NiO/NF   | 52.35    | 11.56    |
| RuO <sub>2</sub> @NiO/NF-6 | 50.29    | 14.32    |

**Table S2.** The mass loading of Ru on RuO<sub>2</sub>@NiO/NF.

---

| Materials                | Ru loading (mg cm <sup>-2</sup> ) |
|--------------------------|-----------------------------------|
| RuO <sub>2</sub> @NiO/NF | 0.18                              |

---

**Table S3.** Comparison of OH<sub>2</sub>S performance for RuO<sub>2</sub>@NiO/NF || RuO<sub>2</sub>@NiO/NF with recently reported bifunctional electrocatalysts at 100 mA cm<sup>-2</sup>.

| Catalysts                         | Cell voltage (mV) @100 mA cm <sup>-2</sup> | Ref.      |
|-----------------------------------|--------------------------------------------|-----------|
| RuO <sub>2</sub> @NiO/NF          | 93                                         | This work |
| CoFeNiCrMnP/NF                    | 94                                         | 1         |
| Ru NPs/H-NCMTs                    | 108                                        | 2         |
| Ir/PNPC                           | 167                                        | 3         |
| Pt/C                              | 206                                        | This work |
| Ru/NiCo LDH                       | 223                                        | 4         |
| NiCoMoS@Ni(CN) <sub>2</sub>       | 380                                        | 5         |
| ZIF67@CoNiSe-3                    | 450                                        | 6         |
| Pt/CoFe/NF                        | 531                                        | 7         |
| Mn-Ni <sub>3</sub> S <sub>2</sub> | 634                                        | 8         |

**Table S4.** IC results of  $\text{NH}_4^+$ ,  $\text{NO}_3^-$ , and  $\text{NO}_2^-$  before and after electrolysis.

| Ion species     | Before electrolysis (mg L <sup>-1</sup> ) | After electrolysis (mg L <sup>-1</sup> ) | Increase (mmol) |
|-----------------|-------------------------------------------|------------------------------------------|-----------------|
| $\text{NH}_4^+$ | 22.736                                    | 25.628                                   | 0.003929        |
| $\text{NO}_3^-$ | 1.203                                     | 1.9                                      | 0.000281        |
| $\text{NO}_2^-$ | 0.117                                     | 0.441                                    | 0.000176        |

## References:

- 1 K. Li, J. He, X. Guan, Y. Tong, Y. Ye, L. Chen and P. Chen, *Small*, 2023, **19**, 2302130.
- 2 W. Wang, Q. Qian, Y. Li, Y. Zhu, Y. Feng, M. Cheng, H. Zhang, Y. Zhang and G. Zhang, *ACS Appl. Mater. Interfaces*, 2023, **15**, 26852-26862.
- 3 L. Wang, Q. Yu, H. Li, S. Zeng, R. Li, Q. Yao, H. Chen, X. Zhang and K. Qu, *Int. J. Hydrogen Energy*, 2024, **90**, 701-709.
- 4 J. Wei, Y. Song, M. Gan, G. An, Y. Shen, X. Zhao, Y. Zhang, P. Liu, B. Xu and J. Guo, *Sustainable Mater. Technol.*, 2025, **44**, e01413.
- 5 N. Nwaji, B. Fikadu, M. Osial, Z. M. Goudarzi, S. Asgaran, L. T. Tufa, J. Lee and M. Giersig, *Int. J. Hydrogen Energy*, 2024, **86**, 554-563.
- 6 W. Liu, T. Shi and Z. Feng, *J. Colloid Interface Sci.*, 2023, **630**, 888-899.
- 7 T. Yu, G. Liu, T. Nie, Z. Wu, Z. Song, X. Sun and Y.-F. Song, *ACS Catal.*, 2024, **14**, 14937-14946.
- 8 G. Wang, W. Ren, F. Zhang, K. Ji, J. Wang, J. Yang, X. Li, R. Liu, S. Wang, Y. Ji, Z. Chen, B.-J. Ni, J. Xie, Z. Yang and Y.-M. Yan, *Chem. Eng. J.*, 2025, **523**, 168088.
